1 **FAP overexpression induce Epithelial-Mesenchymal Transition (EMT) in oral**  
2 **squamous cell carcinoma by down-regulating DPP9 gene.**

3

4 Qing-qing Wu,<sup>a</sup> Meng Zhao,<sup>a</sup> Guang-zhao Huang,<sup>a</sup> Ze-nan Zheng,<sup>a</sup> Wei-sen Zeng,<sup>b</sup>  
5 Xiao-zhi Lv<sup>a</sup> #

6 a: Department of Oral & Maxillofacial Surgery, NanFang Hospital, Southern Medical  
7 University, Guangzhou, China

8 b: Wei-sen Zeng: Department of Cell Biology, School of Basic Medical Science,  
9 Southern Medical University, Guangzhou, China

10 Running title: FAP interacts DPP9 in OSCC

11

12 Word count of abstract: 150

13 Word count of methods and materials: 1207

14

15 Address correspondence to Xiao-zhi Lv: [lxzsurgeon@126.com](mailto:lxzsurgeon@126.com) and Weisen Zeng:  
16 zengws@smu.edu.cn

17 **Abstract**

18 FAP acts as a tumor promoter via epithelial-mesenchymal transition (EMT) in  
19 human oral squamous cell carcinoma (OSCC). The present study was designed to  
20 investigate the interaction proteins with FAP and explore the precise mechanism  
21 of FAP promoting EMT in OSCC. IP-MS analysis confirmed that DPP9 was an  
22 interacting protein of FAP. DPP9 was down-regulated in OSCC tissue samples  
23 compared with MNT using immunohistochemistry and quantitative-PCR detection.  
24 Lower DPP9 was correlated with unfavorable overall survival of patients with OSCC.  
25 Repressing DPP9 accelerates the proliferation of OSCC cells in vitro and in vivo.  
26 Mechanistically, overexpression of FAP downregulate the expression of the DPP9  
27 and the effect of FAP on OSCC proliferation, migration, invasion and EMT could be  
28 reversed by up-regulated DPP9. Our study suggests that FAP could induce EMT  
29 and promote carcinogenesis in oral squamous cell carcinoma by down-regulating  
30 DPP9 gene. That will hint different dimension on therapy for patients with OSCC.

31

32 **Keyword**

33 OSCC, FAP, DPP9, EMT, Oral cancer

34

35 **Abbreviations**

36 FAP: fibroblast activation protein

37 OSCC: Oral squamous cell carcinoma

38 IP: Immunoprecipitation

39 MS: Mass spectrometry

40 qPCR: Quantitative real-time PCR

41 EMT: Epithelial-mesenchymal transition

42

43

44 **Introduction**

45 Cancer of the oral cavity is one of the most common malignancies and an important  
46 cause of morbidity and death(1). OSCC accounts for more than 90% of all oral  
47 cancers with the main factors of consumption of tobacco and/or alcohol and chewing  
48 areca. In spite of major advances in diagnosis and treatment, the prognosis of OSCC  
49 is poor due to invasion, metastasis, and recurrence. Although the oral cavity is easily  
50 examined, yet up to 60% of OSCC cases are undiagnosed in the clinical stage. At  
51 histopathological level, OSCC is characterized squamous differentiation, nuclear  
52 pleomorphisms, invasive growth and metastasis(2). The biomarkers(3) for early  
53 diagnosis of OSCC is therefore key to improving patient prognosis and survival rates.  
54 FAP is a member of the dipeptidyl peptidase (DPP) family with around 50% homology  
55 with DPP4(4). FAP is expressed during development, and in the context of cancer, it is  
56 highly expressed and can be a marker of cancer-associated fibroblasts(CAFs), and  
57 itself has been demonstrated to have pro-tumorigenic activity(5). Structurally, FAP  
58 consists of a 6 amino acid cytoplasmic tail, a single 20 amino acid transmembrane  
59 domain, and a 734 amino acid extracellular domain(4) and FAP have both post-  
60 proline exopeptidase activity and gelatinase activity(6). FAP plays its role in cancer  
61 promotion both by enzymatic effects and non-enzymatic effects. Its dual enzymatic

62 activity gives it a range of putative substrates, and many different types of substrates  
63 had been reported(7). Although many studies(7) suggested that FAP can enhance  
64 various carcinogenesis process, it is still not clear whether that is based on its  
65 enzymatic activity. Emerging(8–10) evidence had suggested FAP’s non-enzymatic role  
66 in cancer.

67 Human cancer FAP expression is reported to correlate to higher tumor grade and  
68 worse survival across a worldwide range(11),like cancer on the breast, colon, stomach,  
69 etc(12–15). Some studies(15, 16) indicated that FAP can induce EMT. Suppressed FAP  
70 expression reduced the adhesion, migration, invasion and metastasis of OSCC cells,  
71 and EMT plays a key role in previous studies of these phenotypes(17–20). At the same  
72 time, EMT-related marker also changed with reduced FAP, such as high expression of  
73 E-cadherin, and low expression of N-cadherin. However, the exact mechanism of FAP  
74 in EMT and OSCC carcinogenesis is still unknown. Thus, this study was designed to  
75 investigate the possible molecular mechanism of FAP in OSCC.

76

## 77 **Results**

78 **FAP negatively regulate DPP9 in its upstream.** The researches currently are  
79 limited to its enzymatic activity and its substrates, but the clinical study of the  
80 FAP inhibitor Talabostat showed no ideal response. Therefore, it is also important  
81 to explore the non-enzymatic activity of FAP. We overexpressed FAP with HIS-tag  
82 in SCC9 cell line and conduct IP using anti-HIS antibody to seek the possible  
83 interaction proteins with FAP. The lysates from antibody group and IgG group  
84 were analyzed by MS, and 14 proteins showed significant difference compared  
85 with the IgG group. We focused on DPP9 with 3 filter conditions: subcellular  
86 localization, GO function and protein domain<sup>9</sup> (Fig.1a), and verified it in the  
87 antibody group lysate by western blotting (Fig.1b). In SCC9/SCC25 FAP<sup>+</sup> cell lines,  
88 the DPP9 was down-regulated and transiently silencing FAP in SCC15 cell lines,  
89 DPP9 expressed lower accordingly. (Fig.1c.  $p < 0.05$ ). In order to explore which site  
90 on FAP may relate with DPP9, wild type FAP, intracellular segment deletion type  
91 FAP (tFAP) and extracellular segment mutation type FAP (mFAP) in pcDNA3.1+  
92 plasmid were transiently transfected into SCC9 cell lines. Then DPP9 antibody  
93 was used to execute IP, and the FAP was detected in four groups of lysates,

94 observing no FAP in tFAP group. This suggested that intracellular part of FAP may  
 95 be the cooperating site with DPP9. (Fig.1d) To confirm FAP will not be regulated  
 96 by DPP9, when transfecting siRNA to silence DPP9, we detected FAP expression  
 97 in both SCC9 and SCC25 groups and observe FAP no difference (Fig.3a).

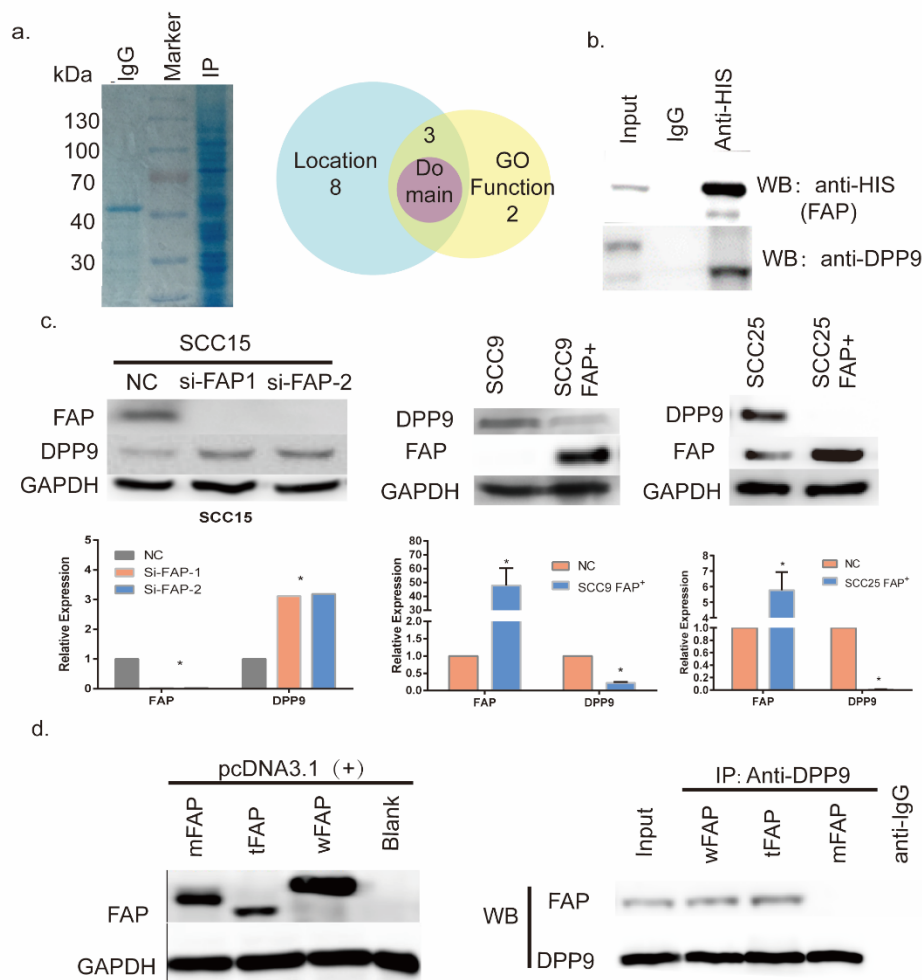

98

99 Figure 1. Negative correlation between FAP and DPP9.

100 Coomassie blue staining shows IP lysate with His-antibody. Venn diagram shows the  
 101 filter condition of 14 peptides from IP-MS. **(b)** Verify DPP9 in IP lysate using DPP9  
 102 antibody. **(c)** In FAP-low-expression SCC9 and SCC25, overexpressing FAP and reduced  
 103 DPP9 can be detected. And in FAP-high -expression SCC15, knockdown FAP shows  
 104 higher DPP9. All data are represented as mean  $\pm$  SD; \* $p < 0.05$ . **(d)** Using pcDNA-  
 105 wFAP/mFAP/tFAP transfecting SCC9 and IP by DPP9 antibody show no blot in tFAP  
 106 group compared with wFAP/mFAP group.

107

108 **DPP9 is downregulated in OSCC.** Through analysis of DPP9 expression from  
109 TCGA head and neck cancer patients in Oncomine, the  $\log^2$  copy number unit of  
110 DPP9 was downregulated in head and neck carcinoma samples (290 cases)  
111 compared with head and neck part (74 cases) and blood samples (264 cases)  
112 (Fig.2a). Three randomized-picked paired OSCC tumor tissues (TUM) and the  
113 MNT were analyzed and western blotting revealed that DPP9 protein were  
114 markedly low expression in the tumor tissues compared to the MNT. (Fig.2c).  
115 DPP9 mRNA expression in Tum was relatively lower in MNT. ( $p < 0.0001$ ,  $n=90$ ,  
116 Fig.2d). Also, protein expression levels of DPP9 were measured in samples of 118  
117 pairs archived paraffin-embedded TUM and MNT using IHC ( $p < 0.005$ ,  $n=45$ )  
118 (Fig.2e). Taken together, these results strongly indicate that DPP9 is  
119 downregulated in human OSCC.

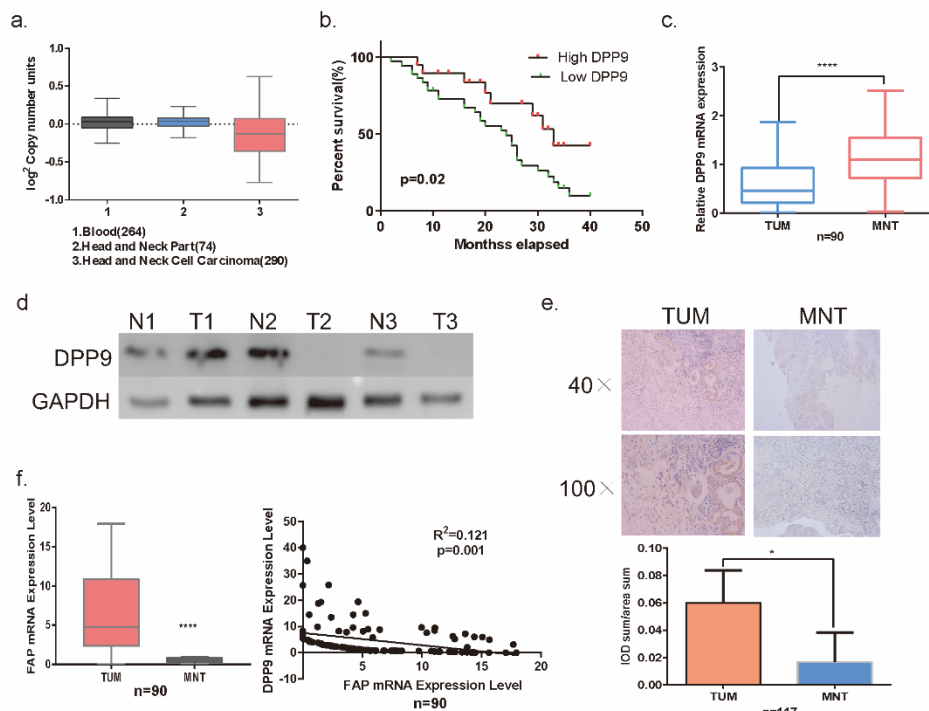

120

121 Fig.2

122 In Oncomine database (The Cancer Genome Atlas - Head and Neck Squamous Cell  
123 Carcinoma DNA Copy Number Data), HNSCC shows lower DPP9 copy number units  
124 compared with that in the blood sample and the Head and Neck part. **(b)** Survival

125 curves (Kaplan–Meier plots) show low-DPP9 is related to a lower survival  
126 rate( $p=0.02$ ). **(c)** mRNA level of DPP9 in 90 pairs clinical samples. **(d)** Three random  
127 pairs of samples detecting the DPP9 protein expression. **(e)** By IHC and statistical  
128 analysis show DPP9 protein level is less in TUM compared with MNT(\*\*\*\* $p<0.0001$ ).  
129 **(f)** mRNA level of DPP9 in 90 pairs clinical samples and egression analysis showed  
130 that DPP9 is negatively associated with FAP in OSCC tissues.

131

132 **Decreased expression of DPP9 is unfavorable for OSCC prognosis.** To explore  
133 the prognostic value of DPP9 expression for OSCC, the follow-up data of 118  
134 OSCC patients for up to 40months were used to assess the value of DPP9 for  
135 predicting patient survival in OSCC patients. These samples were stained using a  
136 DPP9 antibody and scored using a standard method (summarized in Table 1).  
137 Compared to the adjacent non-tumor OSCC in which DPP9 was strongly  
138 detected, DPP9 was undetectable or found to be only expressed at low levels,  
139 DPP9 was low expressed in OSCC specimens (Fig.2c). We analyzed the  
140 association between DPP9 and the clinicopathological features of OSCC. As  
141 showed in Table 1, strong associations were observed between DPP9 expression  
142 and clinical stage ( $p=0.036$ ), T classification ( $p=0.017$ ), N classification( $p=0.041$ ).  
143 However, the expression of DPP9 was not associated with age, gender and  
144 Lymphatic metastasis. Kaplan–Meier survival analysis revealed a correlation  
145 between DPP9 expression level and overall survival times ( $p=0.02$ , Fig.2b). These  
146 results indicate a significant correlation of the expression of DPP9 with the  
147 prognosis of OSCC.

148

149 **Table1: Clinicopathological characteristics of patient samples and expression of**  
150 **DPP9 in OSCC**

| Variables | n  | DPP9(%)         |                | P value |
|-----------|----|-----------------|----------------|---------|
|           |    | High expression | Low expression |         |
| Age(y)    |    |                 |                | 0.128   |
| ≥60       | 31 | 13              | 18             |         |

|                    |    |    |    |              |
|--------------------|----|----|----|--------------|
| <60                | 87 | 22 | 65 |              |
| Gender             |    |    |    | <b>0.115</b> |
| male               | 86 | 29 | 57 |              |
| female             | 32 | 6  | 26 |              |
| Clinical stage     |    |    |    | <b>0.036</b> |
| I - II             | 60 | 23 | 37 |              |
| III-IV             | 58 | 12 | 46 |              |
| T classification   |    |    |    | <b>0.017</b> |
| 1                  | 15 | 8  | 7  |              |
| 2                  | 61 | 19 | 42 |              |
| 3                  | 7  | 2  | 5  |              |
| 4                  | 35 | 6  | 29 |              |
| N classification   |    |    |    | <b>0.041</b> |
| N0-N1              | 82 | 29 | 53 |              |
| N2-N3              | 36 | 6  | 30 |              |
| Lymphatic invasion |    |    |    | <b>0.358</b> |
| no                 | 84 | 27 | 57 |              |
| yes                | 34 | 8  | 26 |              |
| Vital states       |    |    |    | <b>0.388</b> |
| alive              | 33 | 10 | 23 |              |
| dead               | 65 | 16 | 49 |              |
| censored           | 20 | 9  | 11 |              |

151

152 **DPP9 modulates cell growth of OSCC cells.** To evaluate the functional  
 153 significance of DPP9 on cancer cell proliferation, si-RNA was transfected into  
 154 SCC9 and SCC25 cell lines to specifically knockdown the expression of DPP9. The  
 155 effect of siRNA transfection on the expression of DPP9 was confirmed by western  
 156 blot analysis (Fig.3a, \*\* $p < 0.01$ ). DPP9 knockdown in SCC9 and SCC25 cells  
 157 promoted cell growth in vitro. Colony formation assay showed that suppressing  
 158 DPP9 significantly stimulated cell proliferation (Fig.3b). The growth curves  
 159 determined by CCK-8 assay showed that suppression DPP9 significantly

160 stimulated cell viability in comparison with si-con cells (Fig.3c). Taken together,  
161 these results suggested that DPP9 significantly inhibited cell growth in vitro.  
162

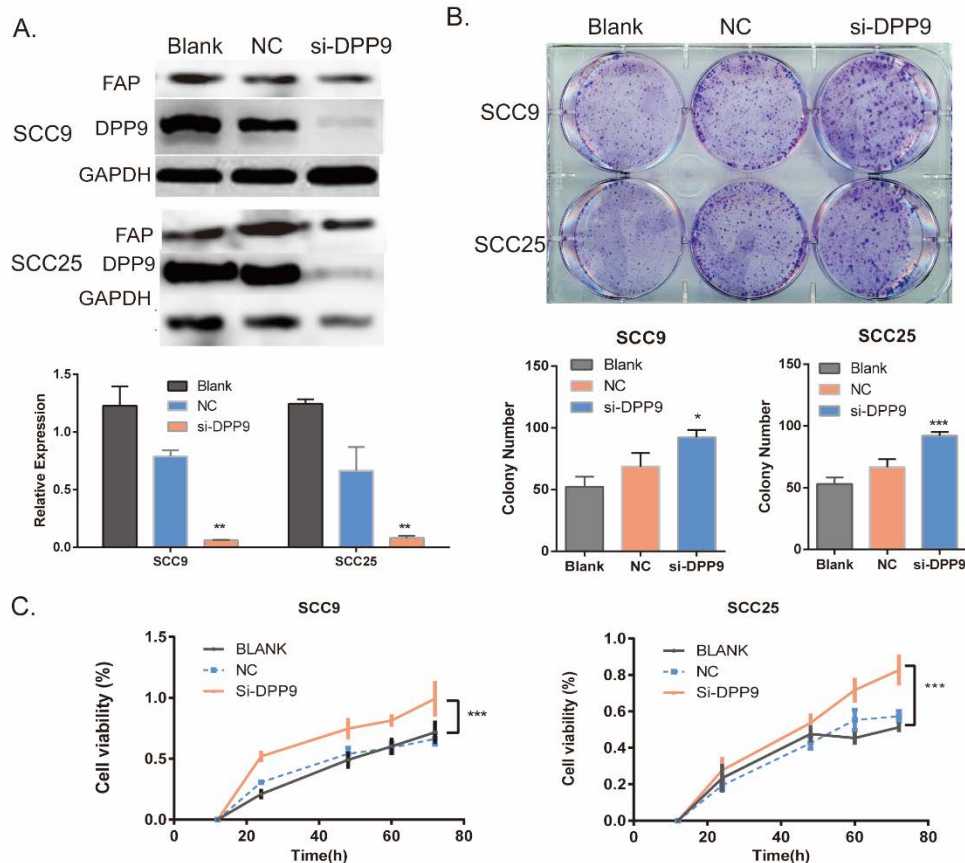

163

164 Fig.3

165 Knockdown of DPP9 causes an anti-tumor effect on OSCC cells. **(a)** Western blot  
166 analysis of DPP9 following DPP9 knockdown for 72h. GAPDH was used as an internal  
167 control. **(b)** Colony formation assay after knockdown of DPP9 in SCC9 and SCC25cells  
168 for 10days (*Up*). The mean number of colonies for each well was determined from  
169 three independent assays (*Down*). **(c)** Growth rates of SCC9 and SCC25 cells  
170 measured by CCK-8 assay after DPP9 knockdown. All data are presented as  
171 mean ± SD; \*p < 0.05; \*\*p < 0.01; \*\*\*p < 0.001 versus control group.

172

173 **Repression of DPP9 promotes cell migration and invasion in vitro.** To investigate  
174 the effects of DPP9 on cancer cell metastatic ability, repression of DPP9 in SCC9



175 and SCC25 cells was conducted to examine the cellular function of invasion and  
176 migration. In a wound-healing assay, there was a marked acceleration in the  
177 silencing group at the edges of the scratch wound of SCC9 and SCC25 cells  
178 (Fig.3c) and Quantitative analysis at 24h confirmed a significant promotion. In  
179 addition, Matrigel invasion assays showed SCC9 and SCC25 cells with  
180 downregulated DPP9 were much more invasive than controls and the similar  
181 tendency in migration assays (Fig.4a, \* $p < 0.05$ , \*\* $p < 0.01$ , \*\*\* $p < 0.005$ ).

182

183 **DPP9 modulates the expression of multiple genes involved in the EMT in OSCC.**

184 Still, use si-DPP9 into SCC9 and SCC25, EMT-associated markers were detected,  
185 where the protein level of E-cadherin was decreased while the N-cadherin,  
186 Vimentin, SNAIL, was markedly increased in compared with control cells in vitro  
187 (Fig.4b). And the phosphorylated ERK1/2 is significantly decreased compared  
188 with the control group with similar pan-ERK1/2 expressions. And the  
189 proliferation associated protein Cyclin D1, BCL-2 is also detected and shown  
190 higher expression.

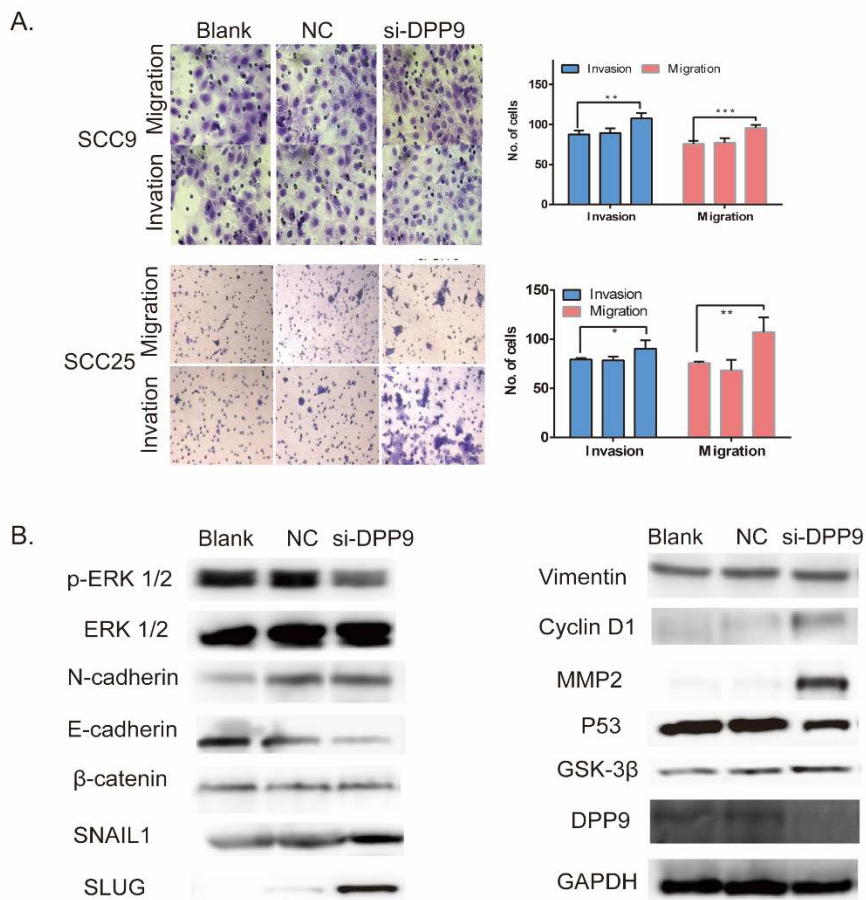

191

192 Fig.4

193 Depression DPP9 promoted cell migration/invasion and induced EMT in vitro. **(a)**  
 194 Transwell migration and invasion assay after DPP9 knockdown for 48h. All data are  
 195 presented as mean  $\pm$  SD; \* $p$  < 0.05; \*\* $p$  < 0.01; \*\*\* $p$  < 0.001. **(b)** Western blot  
 196 analysis of p-ERK1/2, ERK, EMT-associated proteins and P53, DPP9, Cyclin D1  
 197 following knockdown for 48h. GAPDH was used as an internal control.

198

199 **DPP9 modulates cell growth of OSCC cells in vivo.** To assess the effect of DPP9  
 200 of OSCC growth in vivo, DPP9-depleted SCC9 cells, or control cells were injected  
 201 into nude mice subcutaneously, and then monitored tumor growth. Tumor  
 202 generation speed of si-DPP9 cells was significantly faster than in control cells,  
 203 and final volume/weight (20 days) of si-DPP9 group is significantly larger than  
 204 the SCC9 group(Fig.5a). And the EMT-associated protein in si-DPP9 group change  
 205 similarly with treated cells in vitro compared with the untreated group by WB

206 (Fig.5b). All tumors were taken into HE staining and IHC staining using DPP9,  
207 CD44, Ki67 (Fig.5c).

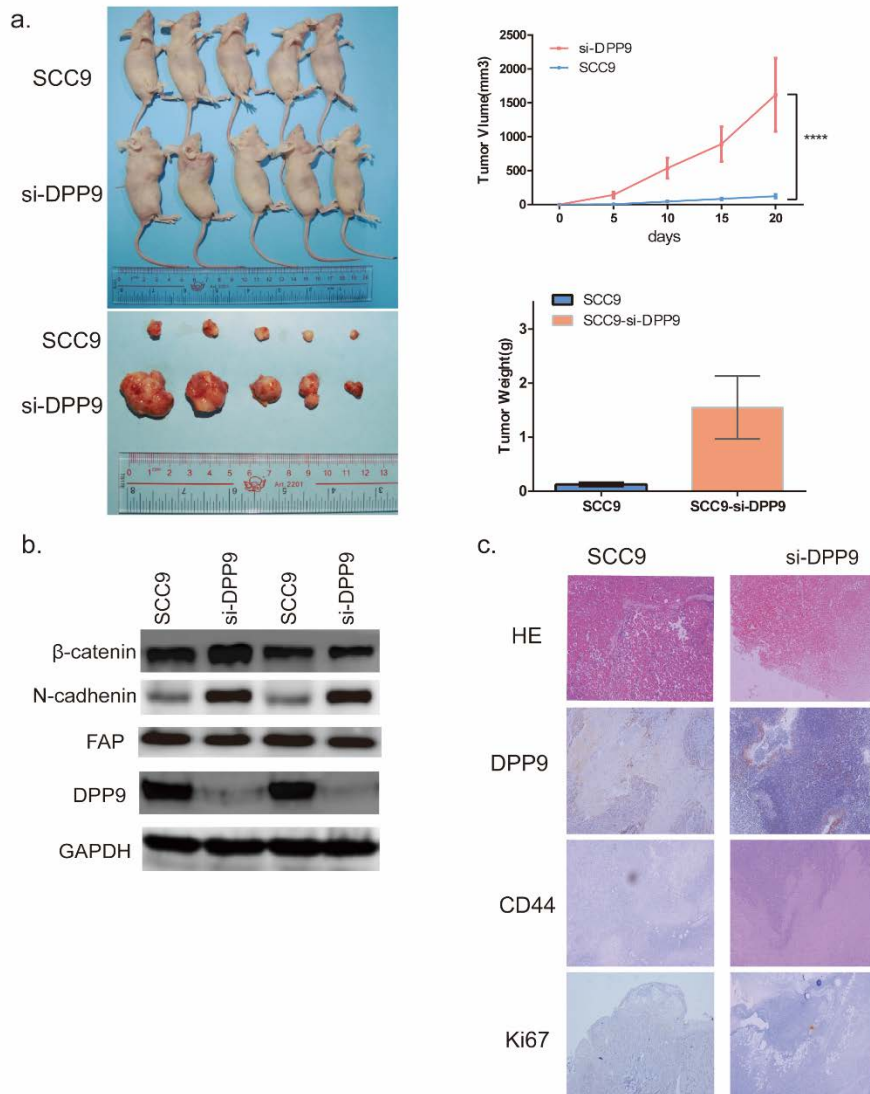

208

209 Fig.5

210 DPP9 modulates cell growth of OSCC cells in vivo. **(a)** Tumor formation for 20days  
211 after injecting cells to BALBc/nude right armpit. The weight of the tumors and  
212 volume change were observed every five days. And the mean weight of tumors for  
213 each group was showed in bar graph. **(b)** Western blot analysis of DPP9, FAP, EMT-  
214 associated proteins in two tumor tissues each group. **(c)** IHC of CD44, Ki-67 and DPP9  
215 verification and HE staining of each group.

216

217 **Cell proliferation and migrative/invasive promotion caused by overexpressing**

218 **FAP is associated with the DPP9 in OSCC cells.** To further delineate the role of  
219 DPP9 in the proliferation and migration/invasive regulated by FAP, the expression  
220 of DPP9 was restored by pCMV-DPP9 plasmid in FAP-overexpressing SCC9 cells  
221 (Fig.6a). As showed in Figure 6, results of the CCK8 assay and colony formation  
222 assay demonstrated that the DPP9 plasmid decreased the cell proliferation and  
223 tumorigenesis (Fig.6b,6e). Consistently, cells numbers of DPP9 plasmid treated  
224 cells of migration and invasion was reduced (Fig.6d). Also, the adhesion test  
225 showed further reduction of adhesion ability of the treated cells (Fig.6c). And  
226 Western blotting showed reversed expression of, SNAIL1, Vimentin, E-cadherin  
227 and N-cadherin, and no significant change of Cyclin D1,  $\beta$ -catenin and BCL-  
228 2(Fig.6f). Taken together, these findings suggest that the observed regulation of  
229 proliferation, tumorigenesis caused by overexpressing FAP is associated with the  
230 DPP9 in OSCC.

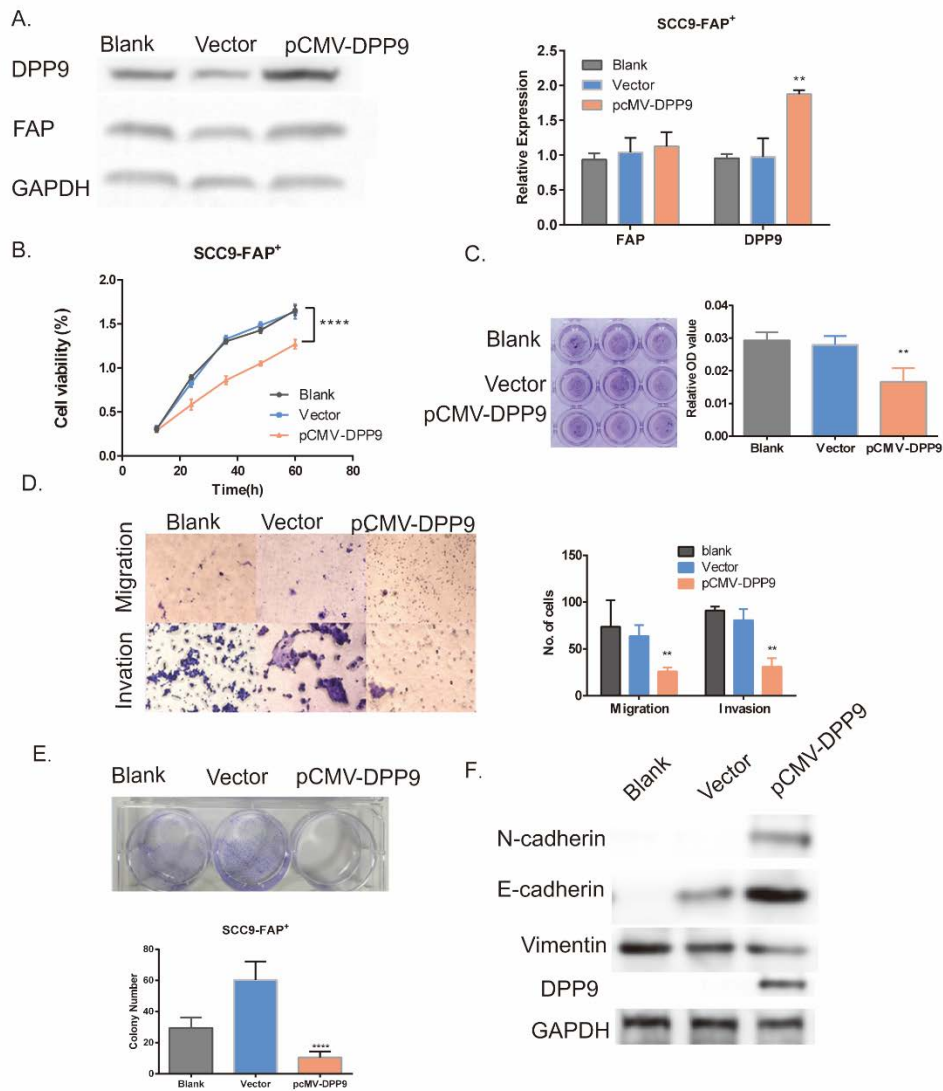

231

232 Fig 6.

233 Cell proliferation and migrative/invasive promotion caused by overexpressing FAP is  
 234 associated with the DPP9 in OSCC cells. **(a)** Verification of DPP9 overexpression in  
 235 SCC9-FAP<sup>+</sup> cells by Western Blotting. **(b)** CCK-8 shows decreased growth rate of  
 236 treated cells. **(c)** Transwell migration and invasion assay after DPP9 overexpressing  
 237 48h. **(d) Up:** Colony formation assay after DPP9 plasmid transfecting for 10days.  
 238 **Down:** The mean number of colonies for each well was determined from three  
 239 independent assays. **(e)** Adhesion test showed further reduction of cell adhere ability  
 240 in the treated group. **(f)** Western blot analysis of N-cadherin, E-cadherin and  
 241 Vimentin level in SCC9-FAP<sup>+</sup> cells after treatment with pCMV-DPP9 for 48h. All data  
 242 are present

243 ed as mean  $\pm$  SD; \* $p$  < 0.05; \*\* $p$  < 0.01; \*\*\* $p$  < 0.001 versus control (Blank, Vector)

## 244 **Discussion**

245 FAP has been considered as a potential immunotherapeutic target(21), and it plays a  
246 key role in cancer promotion both by enzymatic effects and non-enzymatic effects. Its  
247 enzymatic effects attract more attention so far. Its substrates are partially shared with  
248 DPP4(22)-(23). However, Talabostat, the first inhibitor of enzymatic activity of FAP,  
249 showed no significant response in clinical trials(24–26). Emerging evidence supports  
250 the argument that FAP might affect tumorigenicity independent of its enzymatic  
251 activity. Expressing FAP and mutation FAP, both displayed enhanced cancer  
252 phenotypes with no significant difference(8). Chung suggested FAP leads to migration  
253 and its peptidase activity is not essential for such migration(10). Yang et al.(9) Inhibited  
254 FAP with Talabostat does not induce levels of its downstream CCL-2 secretion. Knopf  
255 et al.(27) suggested FAP direct bound to erlin-2, stomatin, and caveolin-1. However, it  
256 is not clear whether FAP binds to erlin-2, stomatin and caveolin-1 molecules through  
257 enzyme activity pattern or non-enzyme activity pattern. FAP may bind to erlin-2  
258 through a non-enzymatic pattern for erlin-2 locating on the endoplasmic reticulum.  
259 Therefore, we are committed to exploring the closest downstream effectors on/inside  
260 the cell that may mediate the regulation of proliferation and metastasis of FAP, and in  
261 14 proteins analyzed by IP-MS. 2 of 14 proteins are located on the cell membrane  
262 and the other 12 are distributed separately on nucleus, cytoplasm, mitochondrion,  
263 cytosol, cytoskeleton. We finally focus on DPP9 because of its similar location, likely  
264 domain and analogous GO function compared to FAP.

265 DPP9 belongs to the DPP gene family(28), locates in cell cytosol, expresses  
266 ubiquitously in human tissues and mainly enriched in lymphocytes and epithelial  
267 cells(29). DPP9 and DPP4 share a high sequence homology, and possess a very similar  
268 tertiary structure and functional activity. Not like DPP4, the intracellular functions of  
269 DPP9 in human cancer are still unclear. DPP9 has two distinct biological effects on  
270 transformed cells in various types of cancer. On the one hand, Lu et al.(30) found DPP9  
271 may act as a survival factor for cells from the Ewing's sarcoma family of tumors cells.  
272 Yao(31) reported that DPP9 overexpression can inhibit PI3K/AKT signaling, attenuate  
273 cell proliferation and promoting apoptosis in human hepatoma cells(32). On the other  
274 hand, DPP9 expression is significantly increased in testicular cancer(29). Thence the

275 pro- or anti-tumor activity of DPP9 may depend on the cell type and the molecular  
276 context within the tumor microenvironment. The functional role of DPP9 in OSCC  
277 remains to be elucidated.

278 In our study, we verified that DPP9 is significantly downregulated in OSCC samples  
279 both from TCGA database and in our sample base and the lower DPP9 expression is  
280 associated with worse prognosis, including clinical stage, T, N classification and lymph  
281 node status. And survival analysis showed that downregulated DPP9 was an  
282 independent prognostic factor for poor 3-year overall survival in OSCC patients. Loss-  
283 of-function experiments indicated that DPP9 knockdown fostered the colonies forming,  
284 cell proliferation speed, migration and invasion of OSCC cells. All these results support  
285 an anti-cancer role for DPP9 in OSCC. To the best of our knowledge, this is the first  
286 study to explore the clinical prognostic value of DPP9 in OSCC.

287 EMT has been confirmed to play a significant role in promoting metastasis in  
288 epithelium-derived carcinoma. Accumulating evidence has shown that EMT confers  
289 adhesion, migration, invasion and metastasis capacity, stemness and multidrug  
290 resistance in tumor cells(17–20). When repressing DPP9, the protein level of E-  
291 cadherin, which is a hallmark of EMT(19, 33, 34), was decreased while the N-cadherin,  
292 SLUG, SNAIL1 was markedly increased in compared with control cells in vitro. And the  
293 Vimentin and  $\beta$ -catenin expression cannot be observed changed. We also detect the  
294 biomarkers of proliferation and metastasis that may be mediated by DPP9. The  
295 expression of MMP2 and Cyclin D1 enhanced while P53 and phosphate-ERK1/2  
296 decreased and GSK-3 $\beta$  show no difference. Thus, our data and results conclude that  
297 the underlying mechanism of DPP9 towards OSCC maybe the EMT properties  
298 regulation. Currently, there is not much research on whether DPP9 affects EMT, while  
299 Tang.(35) found upregulated DPP9 promotes tumorigenicity and EMT in NSCLC. This  
300 difference may be because NSCLC samples in Tang's study included adenocarcinoma  
301 and squamous cell carcinoma, which may have a certain impact on the study.

302 It can be observed the reversed phenotype of tumor growth, migration and invasion  
303 when enforcing DPP9 expression in SCC9-FAP<sup>+</sup> cells. And our conditioned-IP revealed  
304 that the intracellular part of FAP might be the possible site interact with DPP9. We  
305 reach the conclusion that FAP facilitates cell phenotypes and EMT by down-regulating  
306 DPP9. This results innovatively indicate that FAP may induce pro-tumorigenic effects

307 in a non-enzymatic manner. The extracellular segment containing enzyme active site  
308 may not be the only part to promote tumor.

309

## 310 **Materials and methods**

311 **Cell culture, tissue collection, and Ethics Statement.** OSCC cell lines SCC9,  
312 SCC25, SCC15 were purchased from ATCC and maintained in DMEM/F12  
313 supplemented with 10% newborn calf serum (NBCS) (Gibco Company, USA). In  
314 all, 118 OSCC specimens and matched normal tissues (MNT) were obtained at  
315 the time of diagnosis before any therapy from Nanfang Hospital of Southern  
316 Medical University, Guangzhou, from 2015 to 2018. In 118 cases, there were 86  
317 males and 32 females. For the use of these clinical materials for research  
318 purposes, prior written informed consents from all the patients and approval  
319 from the Ethics Committees of Nanfang Hospital of Guangdong Province was  
320 obtained (NO: NFEC-2018-027). All specimens had confirmed the pathological  
321 diagnosis and were staged according to the 2009 UICC-TNM Classification of  
322 Malignant Tumors.

323 **Transient transfection with siRNAs for FAP and DPP9.** siRNA for FAP and DPP9  
324 was designed and synthesized by Genepharma (GenePharma Inc., Suzhou, PR  
325 China). Twenty-four hours before transfection, SCC9 cells were plated onto a 6-  
326 well plate (Jet Bio-Filtration Co., Ltd, Guangzhou, PR China) at a 30–50%  
327 confluence. They were then transfected into cells using Lipofectamine3000  
328 Transfection Reagent (Thermos Fishers Co, Ltd., USA) according to the  
329 manufacturer's protocol. Cells were collected after 48–72 h for the further  
330 experiments. **RNA isolation, reverse transcription, and qRT-PCR.** Total RNA was  
331 extracted from the cells using Trizol (Takara, Shiga, Japan). Reverse transcription  
332 and qPCR were performed in accordance with the manufacturer's instructions  
333 (Vazyme Biotech Co., Ltd, Nanjing). The PCR for each gene was repeated three  
334 times. GAPDH was used as an internal control to normalize FAP and DPP9  
335 expression. Differential expression of FAP was calculated using the method.

336 **Plasmid Construction.** PFU enzyme (Thermo Fisher, Inc; USA) was used for the  
337 PCR program. Using the cDNA from the OSCC samples as template, fragment  
338 wild type FAP (wFAP) with HIS-tag was cloned out with primer A and primer B.



339 Taking wFAP as template, for tFAP (intracellular site deleted), we use primer C  
340 and primer B to clone out fragment tFAP. And for mFAP (site 624-704 deleted),  
341 we had overlap primer D and primer E. After using primer A and D, primer B and  
342 C respectively to clone out fragments F1 and F2, both fragments were added  
343 together as templates and cloned out mFAP with primer A and primer E. These  
344 three fragments (wFAP, tFAP, mFAP) was cloned into plasmid pcDNA3.1(+) using  
345 BamH I and EcoR I . Plasmids was transfected into cells with Lipofectamine3000  
346 Transfection Reagent likely mentioned before. Using the cDNA and primer F/G to  
347 clone fragment DPP9 and set it into plasmid pCMV3-Flag with Kpn I and Xba I .

348 **Western blotting.** Western blotting was performed using a SDS-PAGE  
349 Electrophoresis System according to the previous descriptions with rabbit  
350 polyclonal anti-FAP antibody (1: 1000; Santa Cruz Biotechnology Inc., Seattle,  
351 USA), mouse monoclonal anti-DPPR2 antibody (1:2000; Santa Cruz  
352 Biotechnology Inc., Seattle, USA). Another rabbit polyclonal antibodies contain  
353 HIS-tag, GAPDH, E-cadherin, N-cadherin, Vimentin, MMP2, P53, SNAIL, SLUG  
354 (1:2000; Proteintech Inc., USA) and pan-ERK1/2 and phosate-ERK1/2(1:2000;  
355 CST, USA).

356 **IP assay and MS assay.** The total protein was extracted in SCC9-FAP and IP was  
357 performed using a Protein A/G Magnetic Beads (Bimake, USA). Briefly, SCC9-FAP<sup>+</sup>  
358 cells were washed with phosphate-buffered saline (PBS), lysed in cold IP lysate  
359 buffer, and then centrifuged. Next, the cell lysates were immunoprecipitated  
360 with the monoclonal anti-his-tag antibody (Cell Signaling Technology, Inc.; USA)  
361 and incubated overnight at 4°C. SDS-PAGE was then conducted to examine the  
362 protein levels. The lysate including his-FAP-interacting peptides were collected  
363 and submit to a MS facility (Thermo Fisher, Inc.; USA) for analysis. The  
364 experiments were repeated three times and the detected peptides were  
365 intersected.

366 **Immunohistochemistry (IHC) assay.** Examination of DPP9 expression in  
367 samples of OSCC and its control tissues by IHC was processed with the DPP9  
368 antibody (1: 50, Abcam Inc., USA). The stained tissue sections were reviewed and  
369 scored independently by two pathologists blinded to the clinical parameters. The

370 staining score standard has also been described. For statistical analysis of DPP9  
371 expression in noncancerous tissues against OSCC tissues, staining scores of 0–5  
372 and 6–10 were respectively considered to be a low and high expression.

373 **CCK-8 assay.** Cell Counting Kit-8 assay was used to evaluate the rate of in vitro  
374 cell proliferation. For siDPP9 cells, they were seeded in 96-well plates at a  
375 density of 1000 cells/well and respectively incubated for 12, 24, 48, 70 hours.  
376 10 $\mu$ l of CCK-8 (DOJINDO LABORATORIES Ltd., China) was added to each well and  
377 incubated for 4 h. The absorbance value (OD) of each well was measured at  
378 450nm. Experiments were carried out three times.

379 **Colony formation assay.** Placing 1,0000 treated cells per well in 6-well plates and  
380 after their attachment, there is no contact between cells. Incubate the cells in a  
381 CO<sub>2</sub> incubator at 37°C for 10-15days until cells have formed colonies with  
382 substantial good size (50 cells per colony). Remove medium and rinse cells with  
383 PBS 2 times, and add 1ml methanol per well at room temperature (RT) for 5 min.  
384 Remove methanol and add 0.5% crystal violet carefully and incubate at RT for 2h.  
385 Remove crystal violet and immerse the plates in tap water to rinse off crystal  
386 violet. Air-dry the plates at RT for a day. Scan the plates into image and count  
387 number of colonies, then calculate plating efficiency(PE) by the quotation PE=no.  
388 of colonies formed/no. of cells seeded $\times$ 100%.

389 **Invasion and migration assays.** For the invasion assay, cells were seeded in 100  
390 ml DMEM/F12 media on the top of polyethylene terephthalate (PET)  
391 membranes coated with Matrigel TM (1.5 mg/ml, BD Biosciences Inc.) within  
392 transwell cell culture inserts (24-well inserts, 8 mm pore size; Corning Life  
393 Sciences, Corning, NY, USA). The bottom chamber was filled with 600 ml of  
394 DMEM/F12 media containing 20% FBS. The cells were incubated for 12 h at 37°C  
395 with 5% CO<sub>2</sub>. Subsequently, the cells were fixed in 2.5% (v/v) glutaraldehyde and  
396 stained with 0.1% crystal violet. For the migration assay, the same of the invasion  
397 assay without Matrigel TM. Both cells on the membranes bottom were visualized  
398 under a microscope (Zeiss Ltd., China) and quantified by counting the number of  
399 cells in three randomly chosen fields at 200-fold magnification.

400 **In vivo tumor growth assay.** BALB/c-nude mice (4 weeks old, 18-20g) were

401 purchased from The Laboratory Animal Centre, Southern Medical University. The  
402 Institutional Animal Care and Use Committee of Southern Medical University  
403 approved all experimental procedures. Cells were harvested by trypsinization,  
404 washed twice with cold serum-free medium, and resuspended with serum-free  
405 medium. To evaluate cancer growth in vivo,  $2 \times 10^6$  treated cells were  
406 independently injected subcutaneously into the left axilla in 5 nude mice each  
407 group. Every five days, the length (L) and width (W) of tumors were measured  
408 using calipers, and their volumes were calculated using the equation  $(L \times W^2)/2$ .  
409 On day 20th, the animals were euthanized, and the tumors were excised,  
410 weighed, serial sliced and stained with hematoxylin and eosin (HE).

411 **Statistical analysis.** SPSS 24.0 software (SPSS Inc., Chicago, IL, USA) and  
412 GraphPad software (GraphPad Software, Inc., La Jolla, CA, USA) was used to  
413 analyze all data for statistical significance. Two-tailed Student's t-test was used  
414 for comparisons of two independent groups. One-way ANOVA was used to  
415 determine differences between groups for all in vitro analyses. A  $p < 0.05$  was  
416 considered statistically significant.

417

## 418 **Conclusion**

419 Overall, our study suggests that FAP induces EMT by down-regulating DPP9 gene in  
420 OSCC. DPP9 may play a potential tumor depression role in OSCC. DPP9  
421 overexpression was able to reverse tumorigenesis and metastasis caused by FAP in  
422 OSCC cells. These could be a vigorous therapeutic strategy for future OSCC  
423 treatment, but the specific mechanism and functional sites still need to be further  
424 explored.

425

## 426 **Acknowledgments**

427 QQW carried out her thesis research under the auspices of the NanFang Hospital,  
428 Southern Medical University and Department of Cell Biology, School of Basic  
429 Medical Science, Southern Medical University, Guangzhou, China.

430 **Ethics approval and consent to participate**

431 The study protocol was approved by the Ethics Committees of Nanfang Hospital of  
432 Guangdong Province (NO: NFEC-2018-027).

433 **Availability of data and materials**

434 The datasets used and analyzed during the current study are available from the  
435 corresponding author on reasonable request.

436 **Consent for publication**

437 Not applicable.

438 **Competing interests**

439 The authors declare that they have no competing interests.

440 **Funding**

441 This study was supported by National Natural Science Foundation of China (General  
442 Program: 81472536), Science and Technology Planning Project of Guangdong  
443 Province of China(No:2017A020215181), the Southern Medical University Scientific  
444 Research Fund (CX2018N016), Project of Educational Commission of Guangdong  
445 Province of China (2018KTSCX026), and the Presidential Foundation of the Nanfang  
446 Hospital (2014027).

447

448 **Reference**

- 449 1. Siegel RL, Miller KD, Jemal A. 2019. Cancer statistics, 2019. *CA Cancer J Clin*  
450 69:7–34.
- 451 2. Nosratzahi T. 2017. Salivary Chemical Factors in Relation with Oral Cancer in  
452 Smokers and Non-Smokers: a Literature Review. *J Dent (Shiraz)* 18:237–243.
- 453 3. Shao T, Huang J, Zheng Z, Wu Q, Liu T, Lv X. 2018. SCCA, TSGF, and the Long  
454 Non-Coding RNA AC007271.3 are Effective Biomarkers for Diagnosing Oral  
455 Squamous Cell Carcinoma. *Cell Physiol Biochem* 47:26–38.

- 456 4. Scanlan MJ, Raj BK, Calvo B, Garin-Chesa P, Sanz-Moncasi MP, Healey JH,  
457 Old LJ, Rettig WJ. 1994. Molecular cloning of fibroblast activation protein  
458 alpha, a member of the serine protease family selectively expressed in  
459 stromal fibroblasts of epithelial cancers. *Proc Natl Acad Sci USA* 91:5657–  
460 5661.
- 461 5. Hamson EJ, Keane FM, Tholen S, Schilling O, Gorrell MD. 2014.  
462 Understanding fibroblast activation protein (FAP): substrates, activities,  
463 expression and targeting for cancer therapy. *Proteomics Clin Appl* 8:454–463.
- 464 6. Park JE, Lenter MC, Zimmermann RN, Garin-Chesa P, Old LJ, Rettig WJ. 1999.  
465 Fibroblast activation protein, a dual specificity serine protease expressed in  
466 reactive human tumor stromal fibroblasts. *J Biol Chem* 274:36505–36512.
- 467 7. Puré E, Blomberg R. 2018. Pro-tumorigenic roles of fibroblast activation  
468 protein in cancer: back to the basics. *Oncogene* 37:4343–4357.
- 469 8. Lv B, Xie F, Zhao P, Ma X, Jiang WG, Yu J, Zhang X, Jia J. 2016. Promotion of  
470 Cellular Growth and Motility Is Independent of Enzymatic Activity of  
471 Fibroblast Activation Protein- $\alpha$ . *Cancer Genomics Proteomics* 13:201–208.
- 472 9. Yang X, Lin Y, Shi Y, Li B, Liu W, Yin W, Dang Y, Chu Y, Fan J, He R. 2016. FAP  
473 Promotes Immunosuppression by Cancer-Associated Fibroblasts in the  
474 Tumor Microenvironment via STAT3-CCL2 Signaling. *Cancer Res* 76:4124–  
475 4135.

- 476 10. Chung K-M, Hsu S-C, Chu Y-R, Lin M-Y, Jiaang W-T, Chen R-H, Chen X.  
477 2014. Fibroblast activation protein (FAP) is essential for the migration of bone  
478 marrow mesenchymal stem cells through RhoA activation. PLoS ONE  
479 9:e88772.
- 480 11. Liu F, Qi L, Liu B, Liu J, Zhang H, Che D, Cao J, Shen J, Geng J, Bi Y, Ye L, Pan  
481 B, Yu Y. 2015. Fibroblast activation protein overexpression and clinical  
482 implications in solid tumors: a meta-analysis. PLoS ONE 10:e0116683.
- 483 12. Busek P, Balaziová E, Matrasová I, Hilser M, Tomas R, Syruček M, Zemanová  
484 Z, Krepela E, Belacek J, Sedo A. 2016. Fibroblast activation protein alpha is  
485 expressed by transformed and stromal cells and is associated with  
486 mesenchymal features in glioblastoma. *Tumour Biol* 37:13961–13971.
- 487 13. Park CK, Jung WH, Koo JS. 2016. Expression of cancer-associated fibroblast-  
488 related proteins differs between invasive lobular carcinoma and invasive  
489 ductal carcinoma. *Breast Cancer Res Treat* 159:55–69.
- 490 14. Jung YY, Lee YK, Koo JS. 2015. Expression of cancer-associated fibroblast-  
491 related proteins in adipose stroma of breast cancer. *Tumour Biol* 36:8685–  
492 8695.
- 493 15. Errarte P, Guarch R, Pulido R, Blanco L, Nunes-Xavier CE, Beitia M, Gil J,  
494 Angulo JC, López JI, Larrinaga G. 2016. The Expression of Fibroblast  
495 Activation Protein in Clear Cell Renal Cell Carcinomas Is Associated with

- 496 Synchronous Lymph Node Metastases. PLoS ONE 11:e0169105.
- 497 16. Wang H, Wu Q, Liu Z, Luo X, Fan Y, Liu Y, Zhang Y, Hua S, Fu Q, Zhao M,  
498 Chen Y, Fang W, Lv X. 2014. Downregulation of FAP suppresses cell  
499 proliferation and metastasis through PTEN/PI3K/AKT and Ras-ERK signaling  
500 in oral squamous cell carcinoma. Cell Death Dis 5:e1155.
- 501 17. Lu W, Kang Y. 2019. Epithelial-Mesenchymal Plasticity in Cancer Progression  
502 and Metastasis. Dev Cell 49:361–374.
- 503 18. Kalluri R, Weinberg RA. 2009. The basics of epithelial-mesenchymal transition.  
504 J Clin Invest 119:1420–1428.
- 505 19. Aclouque H, Adams MS, Fishwick K, Bronner-Fraser M, Nieto MA. 2009.  
506 Epithelial-mesenchymal transitions: the importance of changing cell state in  
507 development and disease. J Clin Invest 119:1438–1449.
- 508 20. van Zijl F, Mall S, Machat G, Pirker C, Zeillinger R, Weinhaeusel A, Bilban M,  
509 Berger W, Mikulits W. 2011. A human model of epithelial to mesenchymal  
510 transition to monitor drug efficacy in hepatocellular carcinoma progression.  
511 Mol Cancer Ther 10:850–860.
- 512 21. Jiang G-M, Xu W, Du J, Zhang K-S, Zhang Q-G, Wang X-W, Liu Z-G, Liu S-  
513 Q, Xie W-Y, Liu H-F, Liu J-S, Wu B-P. 2016. The application of the fibroblast  
514 activation protein  $\alpha$ -targeted immunotherapy strategy. Oncotarget 7:33472–  
515 33482.

- 516 22. Keane FM, Nadvi NA, Yao T-W, Gorrell MD. 2011. Neuropeptide Y, B-type  
517 natriuretic peptide, substance P and peptide YY are novel substrates of  
518 fibroblast activation protein- $\alpha$ . *FEBS J* 278:1316–1332.
- 519 23. Koczorowska MM, Tholen S, Bucher F, Lutz L, Kizhakkedathu JN, De Wever  
520 O, Wellner UF, Biniossek ML, Stahl A, Lassmann S, Schilling O. 2016.  
521 Fibroblast activation protein- $\alpha$ , a stromal cell surface protease, shapes key  
522 features of cancer associated fibroblasts through proteome and degradome  
523 alterations. *Mol Oncol* 10:40–58.
- 524 24. Narra K, Mullins SR, Lee H-O, Strzemkowski-Brun B, Magalong K,  
525 Christiansen VJ, McKee PA, Egleston B, Cohen SJ, Weiner LM, Meropol NJ,  
526 Cheng JD. 2007. Phase II trial of single agent Val-boroPro (Talabostat)  
527 inhibiting Fibroblast Activation Protein in patients with metastatic colorectal  
528 cancer. *Cancer Biol Ther* 6:1691–1699.
- 529 25. Eager RM, Cunningham CC, Senzer N, Richards DA, Raju RN, Jones B,  
530 Uprichard M, Nemunaitis J. 2009. Phase II trial of talabostat and docetaxel in  
531 advanced non-small cell lung cancer. *Clin Oncol (R Coll Radiol)* 21:464–472.
- 532 26. Eager RM, Cunningham CC, Senzer NN, Stephenson J, Anthony SP, O'Day SJ,  
533 Frenette G, Pavlick AC, Jones B, Uprichard M, Nemunaitis J. 2009. Phase II  
534 assessment of talabostat and cisplatin in second-line stage IV melanoma.  
535 *BMC Cancer* 9:263.



- 536 27. Knopf JD, Tholen S, Koczorowska MM, De Wever O, Biniossek ML, Schilling  
537 O. 2015. The stromal cell-surface protease fibroblast activation protein- $\alpha$   
538 localizes to lipid rafts and is recruited to invadopodia. *Biochim Biophys Acta*  
539 1853:2515–2525.
- 540 28. Liu J, Huan Y, Li C, Liu M, Shen Z. 2014. Establishment of a selective evaluation  
541 method for DPP4 inhibitors based on recombinant human DPP8 and DPP9  
542 proteins. *Acta Pharm Sin B* 4:135–140.
- 543 29. Yu DMT, Ajami K, Gall MG, Park J, Lee CS, Evans KA, McLaughlin EA, Pitman  
544 MR, Abbott CA, McCaughan GW, Gorrell MD. 2009. The in vivo expression of  
545 dipeptidyl peptidases 8 and 9. *J Histochem Cytochem* 57:1025–1040.
- 546 30. Lu C, Tilan JU, Everhart L, Czarnecka M, Soldin SJ, Mendu DR, Jeha D, Hanafy  
547 J, Lee CK, Sun J, Izycka-Swieszewska E, Toretsky JA, Kitlinska J. 2011.  
548 Dipeptidyl peptidases as survival factors in Ewing sarcoma family of tumors:  
549 implications for tumor biology and therapy. *J Biol Chem* 286:27494–27505.
- 550 31. Yao T-W, Kim W-S, Yu DMT, Sharbeen G, McCaughan GW, Choi K-Y, Xia P,  
551 Gorrell MD. 2011. A novel role of dipeptidyl peptidase 9 in epidermal growth  
552 factor signaling. *Mol Cancer Res* 9:948–959.
- 553 32. Spagnuolo PA, Hurren R, Gronda M, MacLean N, Datti A, Basheer A, Lin F-H,  
554 Wang X, Wrana J, Schimmer AD. 2013. Inhibition of intracellular dipeptidyl  
555 peptidases 8 and 9 enhances parthenolide's anti-leukemic activity. *Leukemia*

556 27:1236–1244.

557 33. van Roy F, Berx G. 2008. The cell-cell adhesion molecule E-cadherin. *Cell Mol*

558 *Life Sci* 65:3756–3788.

559 34. Peinado H, Olmeda D, Cano A. 2007. Snail, Zeb and bHLH factors in tumour

560 progression: an alliance against the epithelial phenotype? *Nat Rev Cancer*

561 7:415–428.

562 35. Tang Z, Li J, Shen Q, Feng J, Liu H, Wang W, Xu L, Shi G, Ye X, Ge M, Zhou X,

563 Ni S. 2017. Contribution of upregulated dipeptidyl peptidase 9 (DPP9) in

564 promoting tumoregenicity, metastasis and the prediction of poor prognosis

565 in non-small cell lung cancer (NSCLC). *Int J Cancer* 140:1620–1632.

566

567

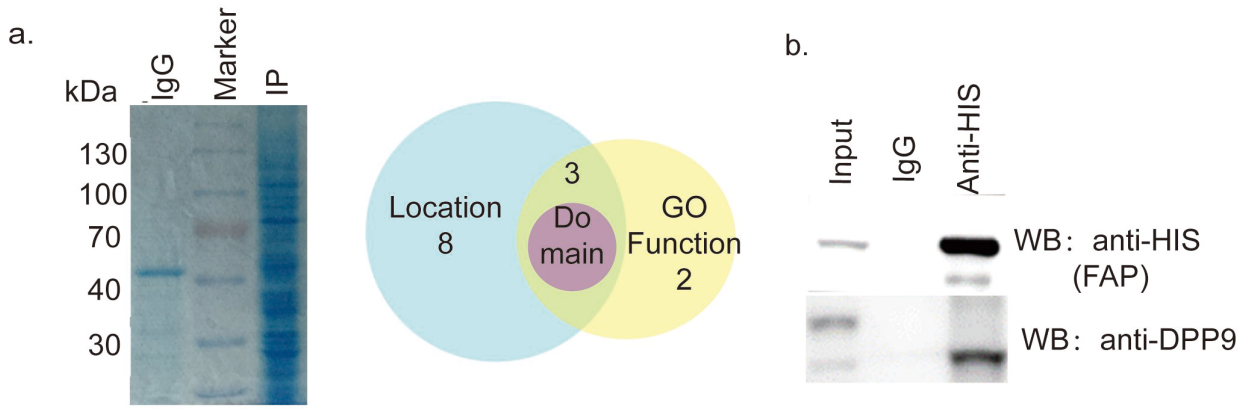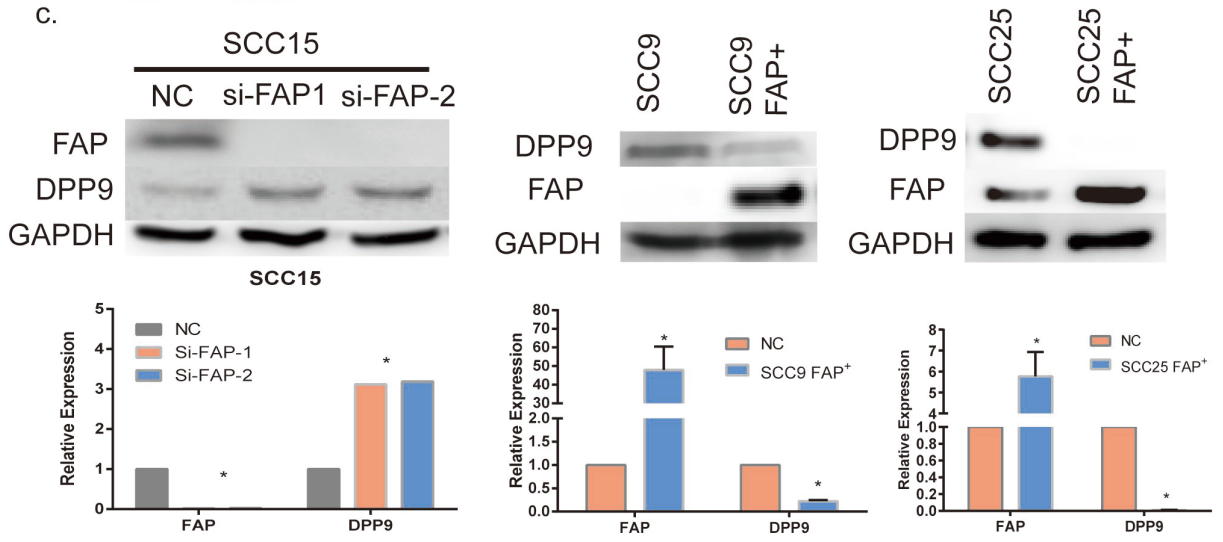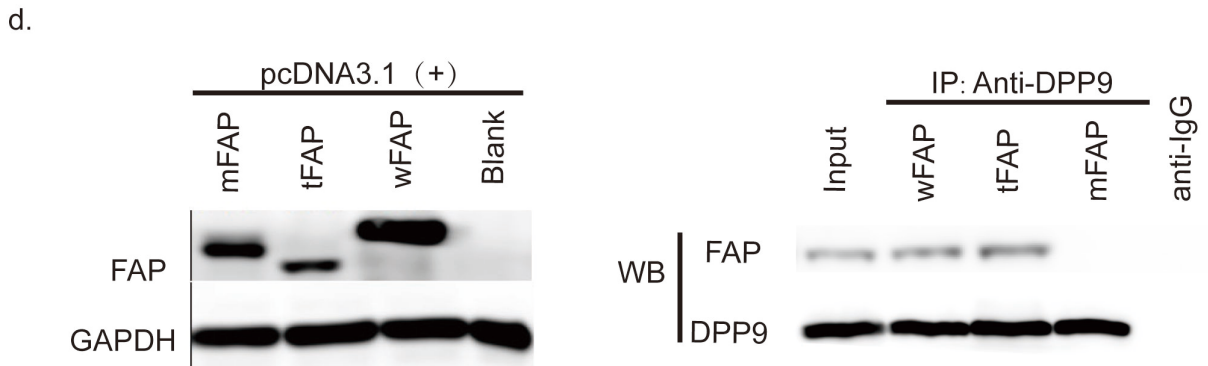

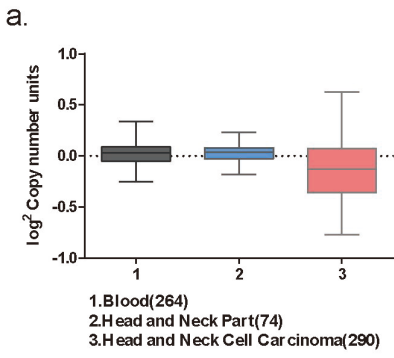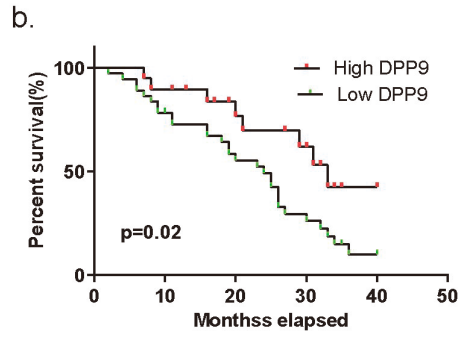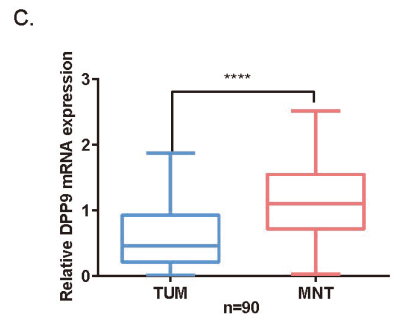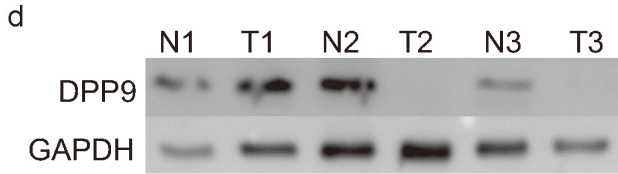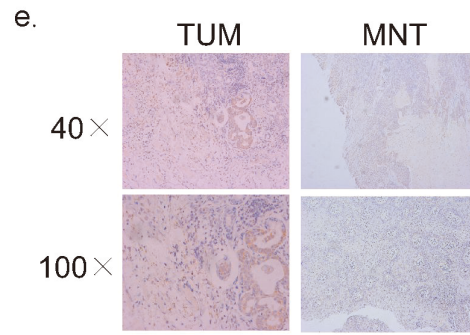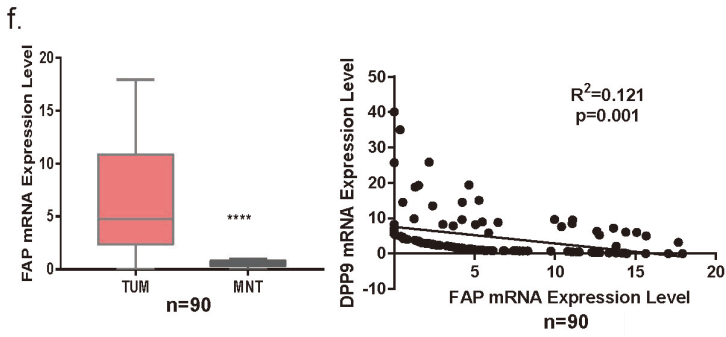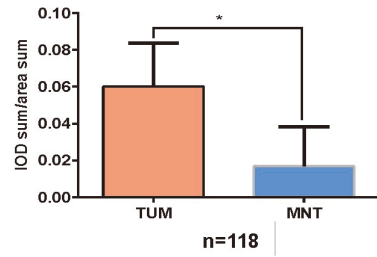

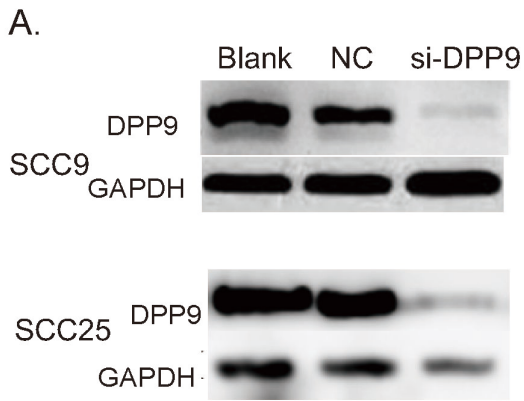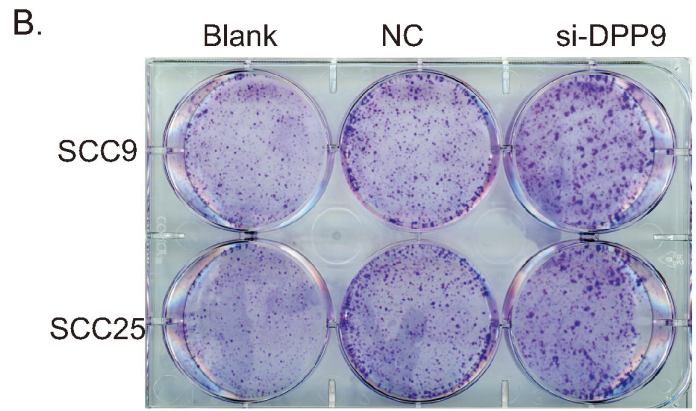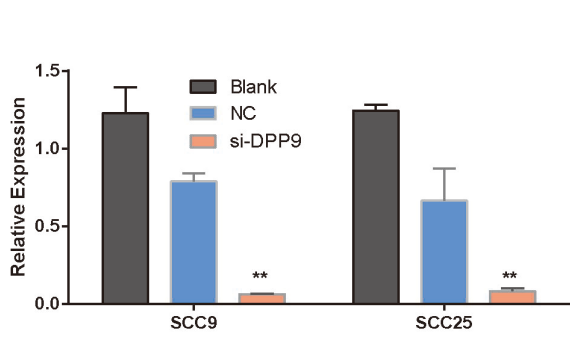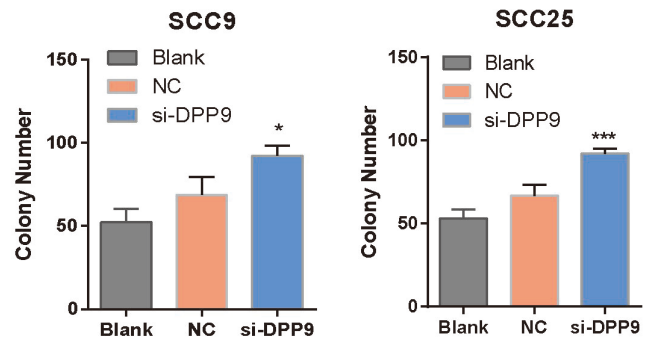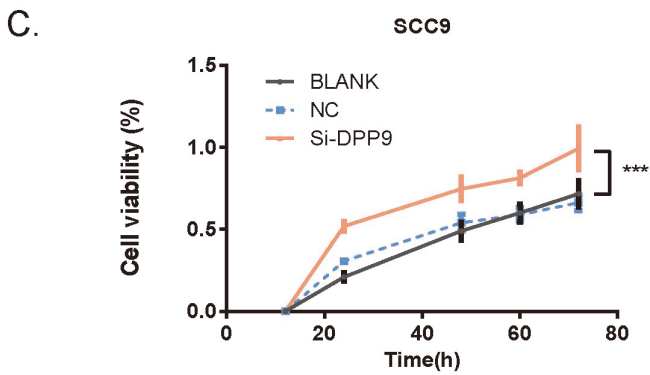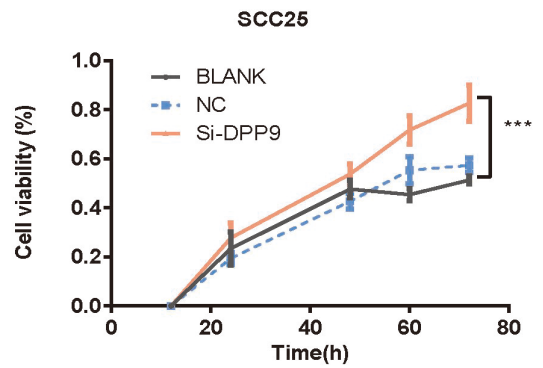

A.

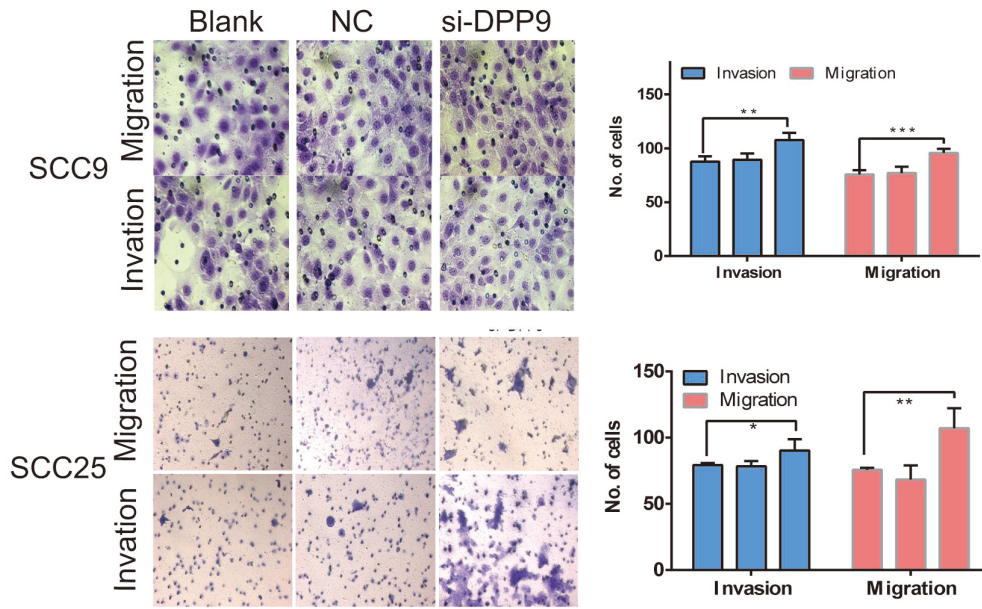

B.

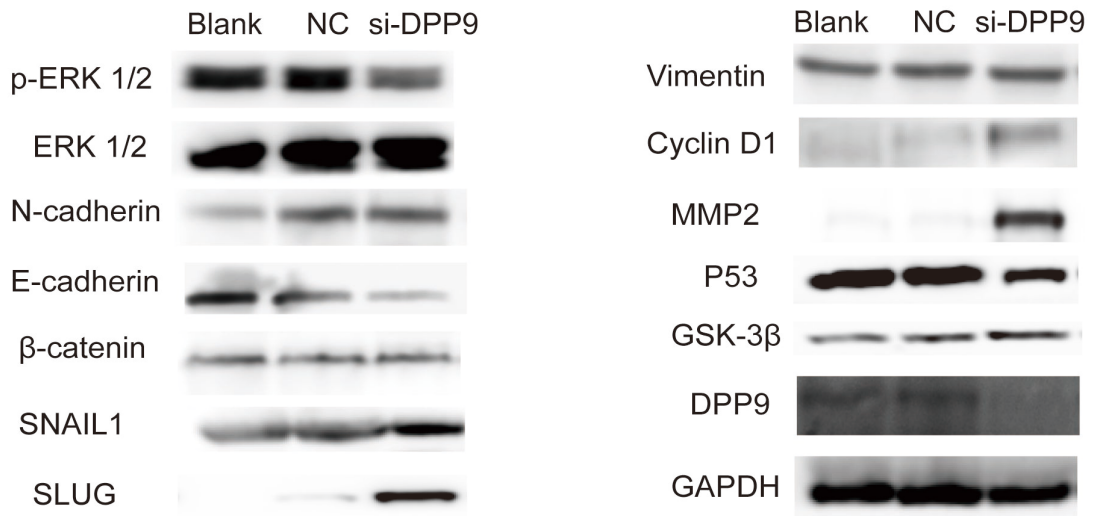

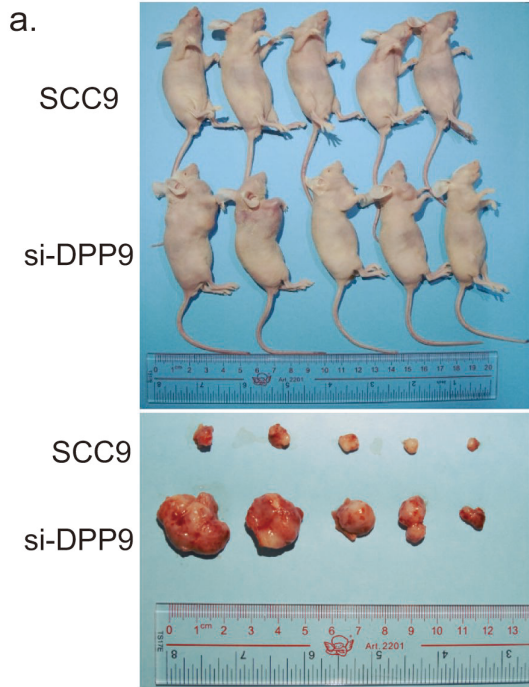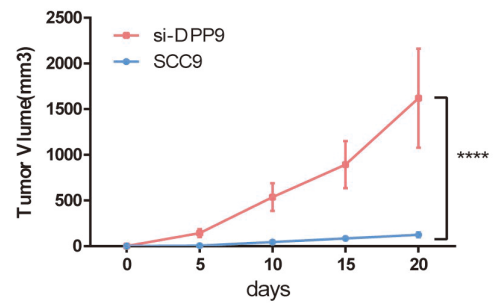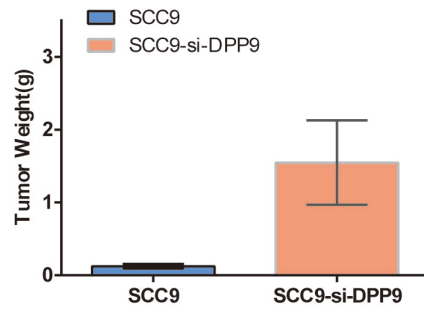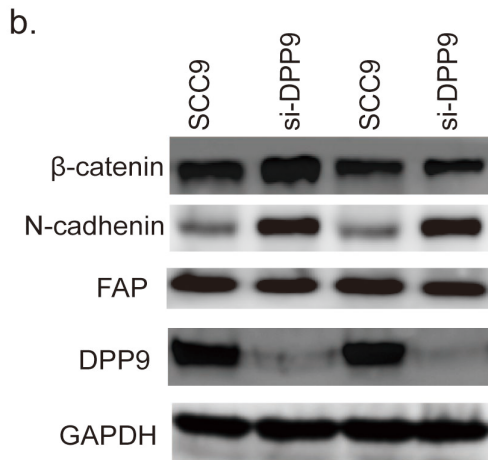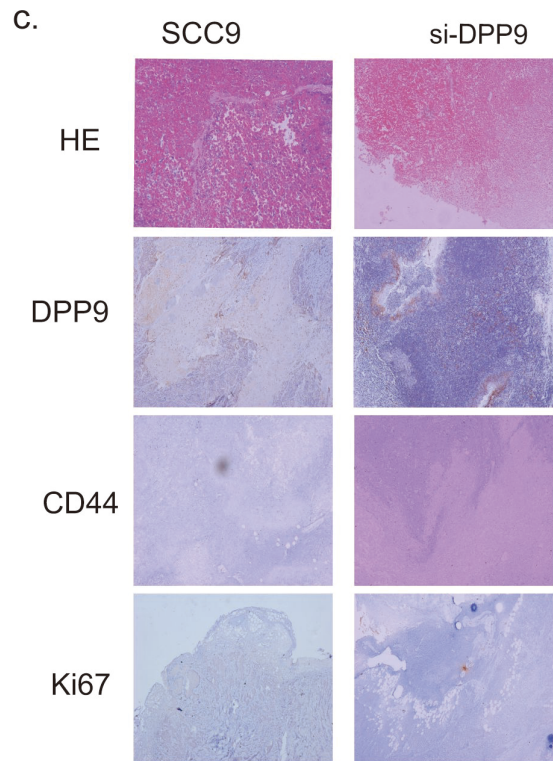

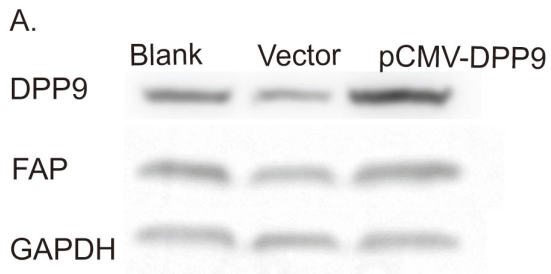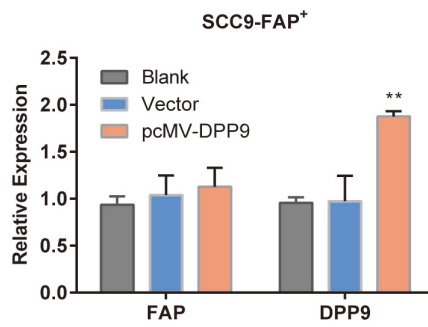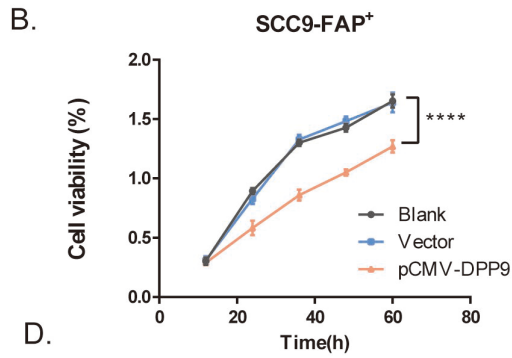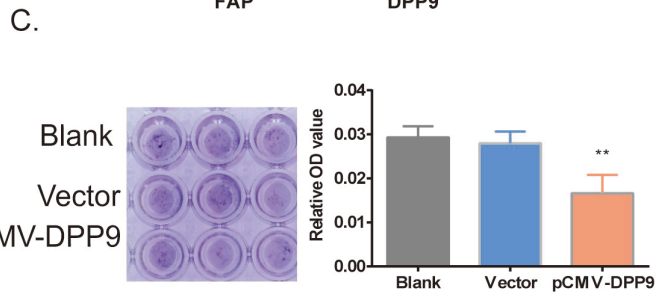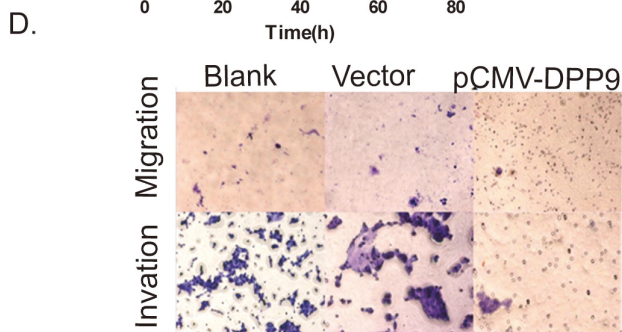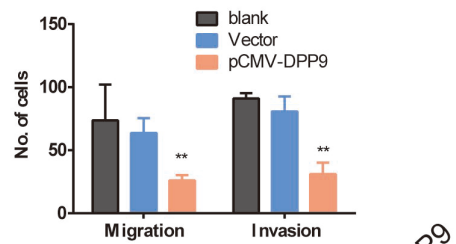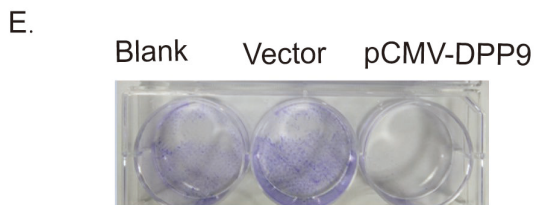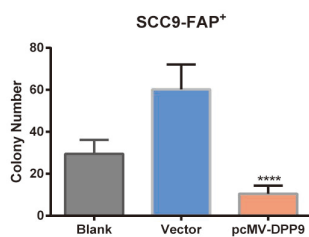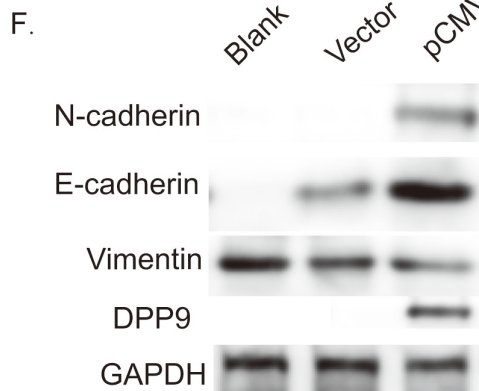

Source: https://www.biorxiv.org/content/10.1101/765743v1.full.pdf
